# Supplementary material
Source: publisher figshare collection journal article supplement (https://acs.figshare.com/ndownloader/files/12702545)
Supplement: Supplementary file 1 [file 12702545]

# Supporting Information for: Hydrogen Bonding Controls the Structural Evolution in Perovskite-Related Hybrid Platinum (IV) Iodides

Hayden A. Evans,<sup>†,‡</sup> Douglas H. Fabini,<sup>¶,‡</sup> Jessica L. Andrews,<sup>†</sup> Mitchell Koerner,<sup>§</sup>  
Molleigh B. Preefer,<sup>†,‡</sup> Guang Wu,<sup>†</sup> Fred Wudl,<sup>¶</sup> Anthony K. Cheetham,<sup>‡,||</sup> and  
Ram Seshadri<sup>\*,†,¶,‡</sup>

<sup>†</sup>*Department of Chemistry and Biochemistry*

*University of California, Santa Barbara, California 93106, United States*

<sup>‡</sup>*Materials Research Laboratory*

*University of California, Santa Barbara, California 93106, United States*

<sup>¶</sup>*Materials Department*

*University of California, Santa Barbara, California 93106, United States*

<sup>§</sup>*Physics Program, College of Creative Studies*

*University of California, Santa Barbara, California 93106, United States*

<sup>||</sup>*Department of Materials Science and Engineering*

*National University of Singapore, Singapore 117575.*

E-mail: seshadri@mrl.ucsb.edu

# Material descriptions

All structures reported were solved via single crystal X-ray diffraction with relevant crystallographic data summarized in Tables S1 and S2.

Table S1: Crystallographic Data for  $(\text{NH}_4)_2\text{PtI}_6$  and  $(\text{MA})_2\text{PtI}_6$

| Empirical Formula                   | $(\text{NH}_4)_2\text{PtI}_6$ |                  | $(\text{CH}_3\text{NH}_3)_2\text{PtI}_6$ |
|-------------------------------------|-------------------------------|------------------|------------------------------------------|
| Crystal habit, color                | cubic, bronze                 |                  | hexagonal, bronze                        |
| Crystal system                      | cubic                         | tetragonal       | trigonal                                 |
| Space group (#)                     | $Fm\bar{3}m$ (225)            | $P4/mnc$ (128)   | $R\bar{3}m$ (136)                        |
| Volume ( $\text{\AA}^3$ )           | 1397(1)                       | 681.6(1)         | 1250.5(2)                                |
| $T$ (K)                             | 290                           | 100              | 273                                      |
| $a$ ( $\text{\AA}$ )                | 11.179(4)                     | 7.6446(5)        | 7.943(5)                                 |
| $b$ ( $\text{\AA}$ )                | 11.179(4)                     | 7.6446(5)        | 7.943(5)                                 |
| $c$ ( $\text{\AA}$ )                | 11.179(4)                     | 11.6625(9)       | 22.88(2)                                 |
| $\alpha$ ( $^\circ$ )               | 90                            | 90               | 90                                       |
| $\beta$ ( $^\circ$ )                | 90                            | 90               | 90                                       |
| $\gamma$ ( $^\circ$ )               | 90                            | 90               | 120                                      |
| $Z$                                 | 4                             | 2                | 3                                        |
| $\rho$ ( $\text{g mol}^{-1}$ )      | 984.51                        | 985.52           | 1014.58                                  |
| Dens. ( $\text{g cm}^{-3}$ )        | 4.681                         | 4.802            | 4.042                                    |
| Abs. ( $\text{mm}^{-1}$ )           | 23.257                        | 23.834           | 19.491                                   |
| $F_{000}$                           | 1640                          | 822              | 1284                                     |
| Reflections (unique)                | 1167(175)                     | 5177(532)        | 2643(423)                                |
| $R_{int}$                           | 0.0523                        | 0.0305           | 0.0443                                   |
| $R_1$                               | 0.0518                        | 0.0291           | 0.0412                                   |
| $wR_R$                              | 0.0954                        | 0.0513           | 0.1137                                   |
| $\partial F$ ( $e\text{\AA}^{-3}$ ) | 1.117 & $-6.062$              | 1.637 & $-3.065$ | 1.132 & $-2.843$                         |
| GOF                                 | 1.102                         | 1.388            | 0.905                                    |

Figure S1(a) displays the 300 K structure of  $(\text{NH}_4)_2\text{PtI}_6$  which crystallizes in the space group  $Fm\bar{3}m$  and is isostructural to the VDHP  $\text{K}_2\text{PtCl}_6$ . In this structure, Pt and I are found on face-centered cubic lattices with ammonium cations in tetrahedral cavities.<sup>1,2</sup> Figure 1(b) presents the 100 K structure, space group  $P4/mnc$ . At low temperature  $(\text{NH}_4)_2\text{PtI}_6$  distorts similar to other perovskites with an in phase octahedral rotation parallel to the  $c$ -axis, described by Glazer tilting nomenclature as a  $a^0a^0c^+$  distortion.<sup>3</sup>

Figure S2 illustrates the 300 K structure of  $(\text{MA})_2\text{PtI}_6$ , space group  $R\bar{3}m$ . We observe

Table S2: Crystallographic Data for (FA)<sub>2</sub>PtI<sub>6</sub> and (GUA)<sub>2</sub>PtI<sub>6</sub>.

| Empirical Formula                | [CH(NH <sub>2</sub> ) <sub>2</sub> ] <sub>2</sub> PtI <sub>6</sub> |                           | [C(NH <sub>2</sub> ) <sub>3</sub> ] <sub>2</sub> PtI <sub>6</sub> |
|----------------------------------|--------------------------------------------------------------------|---------------------------|-------------------------------------------------------------------|
| Crystal habit, color             | needle, bronze                                                     |                           | block, bronze                                                     |
| Crystal system                   | monoclinic                                                         | tetragonal                | hexagonal                                                         |
| Space group (#)                  | <i>P</i> 2 <sub>1</sub> / <i>n</i> (14)                            | <i>I</i> 4/ <i>m</i> (87) | <i>P</i> 63 <i>mc</i> (186)                                       |
| Volume (Å <sup>3</sup> )         | 855.0(2)                                                           | 859(3)                    | 924.8(3)                                                          |
| <i>T</i> (K)                     | 100                                                                | 350                       | 100                                                               |
| <i>a</i> (Å)                     | 7.679(2)                                                           | 9.65(2)                   | 9.369(2)                                                          |
| <i>b</i> (Å)                     | 13.360(3)                                                          | 9.65(2)                   | 9.369(2)                                                          |
| <i>c</i> (Å)                     | 8.572(2)                                                           | 9.21(2)                   | 12.164(2)                                                         |
| $\alpha$ (°)                     | 90                                                                 | 90                        | 90                                                                |
| $\beta$ (°)                      | 108.695(9)                                                         | 90                        | 90                                                                |
| $\gamma$ (°)                     | 90                                                                 | 90                        | 120                                                               |
| <i>Z</i>                         | 2                                                                  | 2                         | 2                                                                 |
| $\rho$ (g mol <sup>-1</sup> )    | 1046.63                                                            | 1041.59                   | 1076.67                                                           |
| Dens. (g cm <sup>-3</sup> )      | 4.173                                                              | 4.027                     | 3.866                                                             |
| Abs. (mm <sup>-1</sup> )         | 19.516                                                             | 18.923                    | 17.588                                                            |
| <i>F</i> <sub>000</sub>          | 892                                                                | 882                       | 924                                                               |
| Reflections (unique)             | 7379(2049)                                                         | 956(459)                  | 4907(1083)                                                        |
| <i>R</i> <sub>int</sub>          | 0.0316                                                             | 0.0459                    | 0.0335                                                            |
| <i>R</i> <sub>1</sub>            | 0.0271                                                             | 0.0736                    | 0.0256                                                            |
| <i>wR</i> <sub>R</sub>           | 0.0577                                                             | 0.1798                    | 0.0606                                                            |
| $\partial F$ (eÅ <sup>-3</sup> ) | 1.313 & -2.026                                                     | 1.775 & -1.275            | 1.992 & -1.654                                                    |
| GOF                              | 1.235                                                              | 1.104                     | 1.047                                                             |

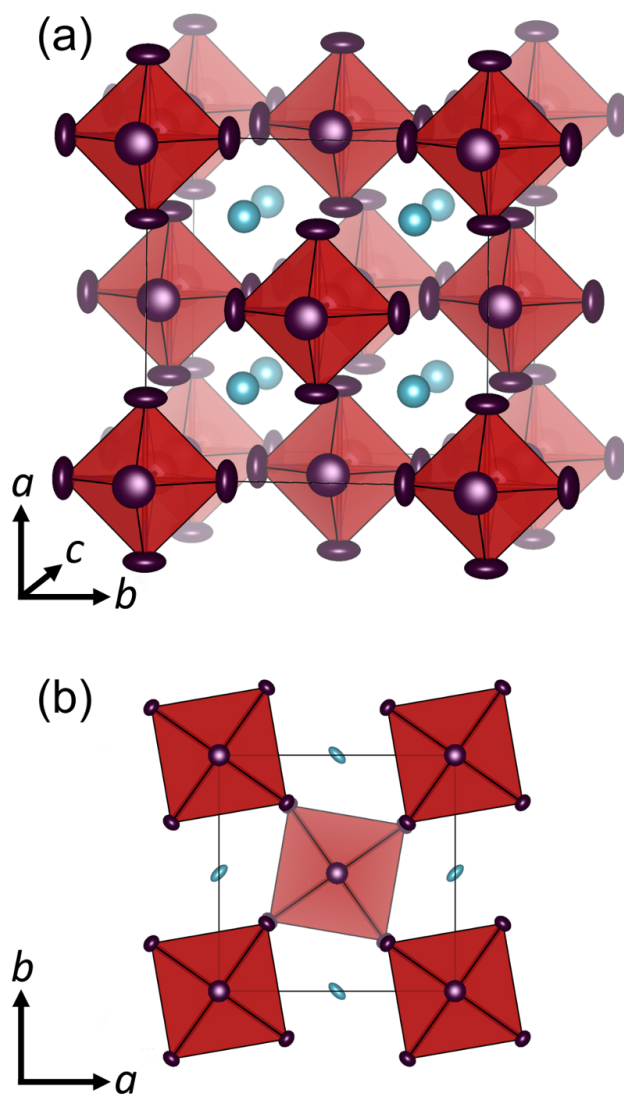

Figure S1: Crystal structure of  $(\text{NH}_4)_2\text{PtI}_6$  with displacement ellipsoids (95% probability). (a) 300 K structure, viewed along  $c$ -axis, (b) 100 K structure, viewed along the  $c$ -axis to emphasize octahedral tilting.



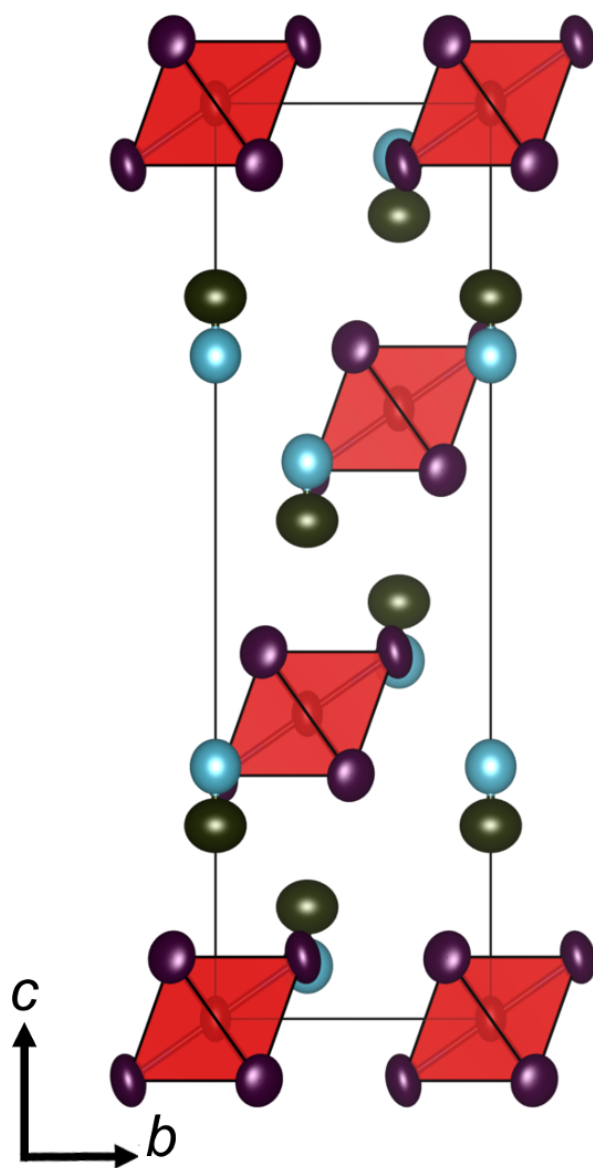

Figure S2: Crystal structure of  $(\text{MA})_2\text{PtI}_6$  at 300 K, with displacement ellipsoids (95% probability), viewed down along  $a$ -axis.

no first-order phase transition between 100 K and 480 K, though a second-order phase transition has previously been suggested at 134 K.<sup>4,5</sup> The platinum ions in  $(\text{MA})_2\text{PtI}_6$  are found on Wyckoff site  $3a$  with site symmetry  $\bar{3}m$ , and iodide ions are found on Wyckoff site  $18h$  with site symmetry  $.m$ . The methylammonium cations are modeled here as static molecules aligned parallel to the  $c$ -axis.

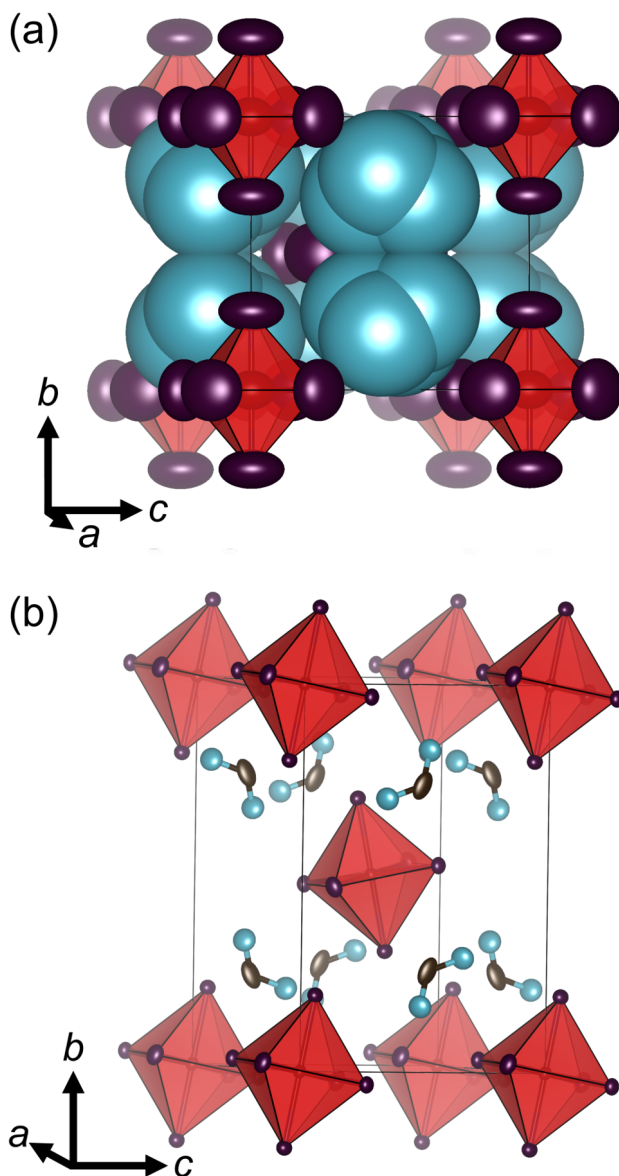

Figure S3: Crystal structure of  $(\text{FA})_2\text{PtI}_6$  with displacement ellipsoids (95% probability). (a) 340 K, viewed along  $a$ -axis. (b) 100 K and below, viewed down  $a$ -axis.

Figure S3 depicts the high temperature (340 K and warmer) and low temperature

(340 K to 100 K) structures of  $(\text{FA})_2\text{PtI}_6$ . Some of the authors previously reported a compound of this empirical formula as isostructural to  $\text{K}_2\text{PtI}_6$ , but upon NMR analysis concluded this was incorrect. It was found that formamidineium ions degraded in solution (if the reaction temperature was brought above 70°C), yielding free  $\text{NH}_4^+$  cations, which precipitate from solution in the form of  $(\text{NH}_4)_2\text{PtI}_6$ . If the solution is kept above 70°C for 20 minutes,  $(\text{NH}_4)_2\text{PtI}_6$  is produced essentially pure. An erratum was submitted for the previous report.<sup>8</sup>

Figure S3(a) illustrates the high temperature phase of formamidineium platinum iodide, space group  $I4/m$ , viewed along the  $a$ -axis, depicting  $[\text{PtI}_6]^{2-}$  octahedra and disordered formamidineiums. Platinum ions are found on Wyckoff site  $2a$  with site symmetry  $4/m..$ , with two independent iodides residing on the  $8h$  and  $4e$  Wyckoff sites, site symmetry  $m..$  and  $4..$ , respectively. Formamidineium cations are modeled as distorted tetrahedra. Figure S3(b) displays the low temperature structure of formamidineium platinum iodide, space group  $P2_1/n$ , illustrating canted octahedra and ordered formamidineium cations. The structure contains platinum ions on Wyckoff position  $2a$  with site symmetry  $\bar{1}$ , and 3 independent iodide ions as well as formamidineium C and N atoms located on general positions  $4e$ . There are currently few reported formamidineium-containing VHDPs, but there are compounds that contain organic cations such as dimethylammonium which crystallize with similar structural motifs.<sup>9,10</sup>

Figure S4 displays the stable structure (between 100 K and 423 K) of  $(\text{GUA})_2\text{PtI}_6$ , space group  $P6_3mc$ , viewed along the  $a$ -axis. Platinum ions are found on Wyckoff position  $2b$  with site symmetry  $3m..$  and iodide ions and carbon atoms are found on  $6c$  positions, site symmetry  $m..$ . There are two crystallographically distinct guanidineium cations within the unit cell of the compound, both of which are modeled here without disorder. The inorganic lattice is comprised of planes of similarly tilted  $[\text{PtI}_6]^{2-}$  octahedra which alternate along the  $c$ -axis.  $(\text{GUA})_2\text{PtI}_6$  is similar to past reported guanidineium chloro- and bromometallate structures, though those reported consistently crystallize in the centrosymmetric space

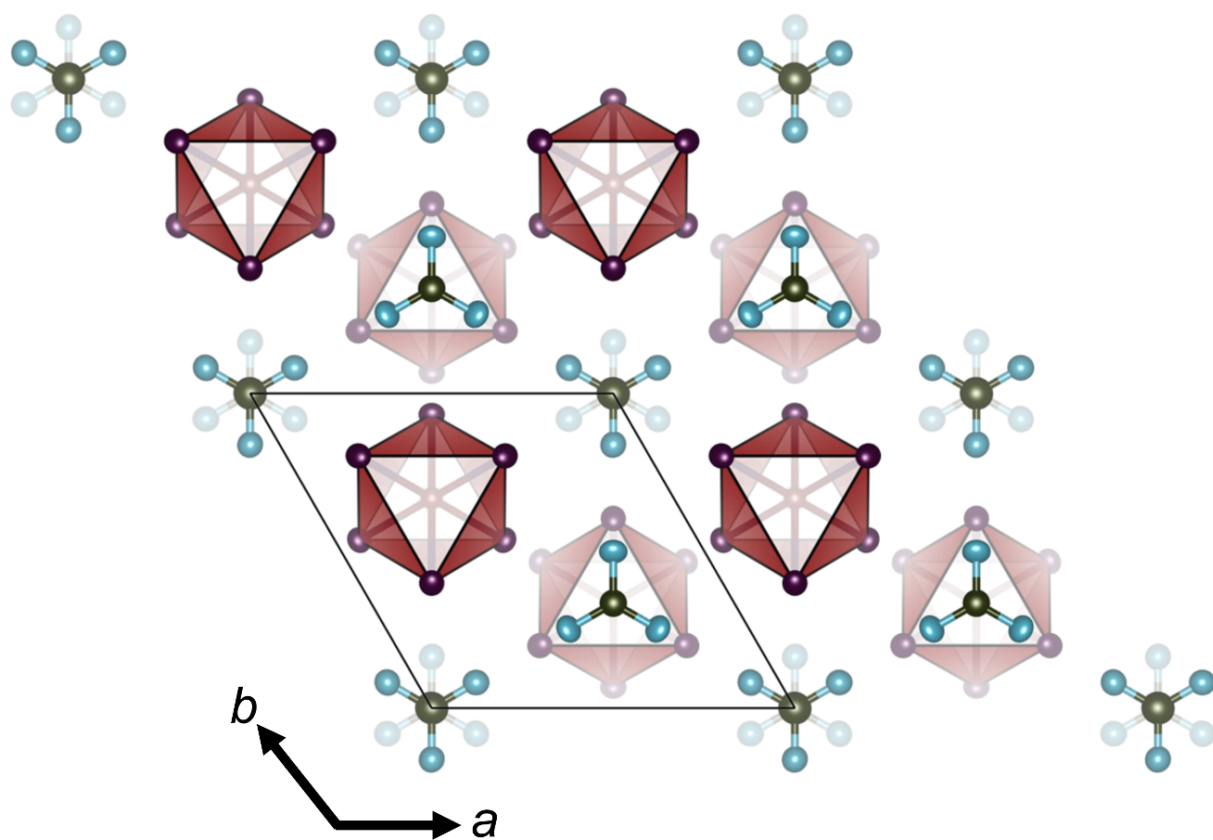

Figure S4: Crystal structure of  $(\text{GUA})_2\text{PtI}_6$  at 100 K, viewed along the  $c$ -axis, with displacement ellipsoids (95% probability).

group,  $C2/m$ .<sup>11</sup>

## Powder X-ray Diffraction

Experimental laboratory PXRD data was Rietveld refined (without atomic occupancy) using room temperature single crystal diffraction as the structural comparison (Figure S5). The refinements indicate that the each bulk sample has unit cell parameters close to single crystal diffraction dimensions (Table S3 refined data, Tables S1 and S2 for single crystal data).

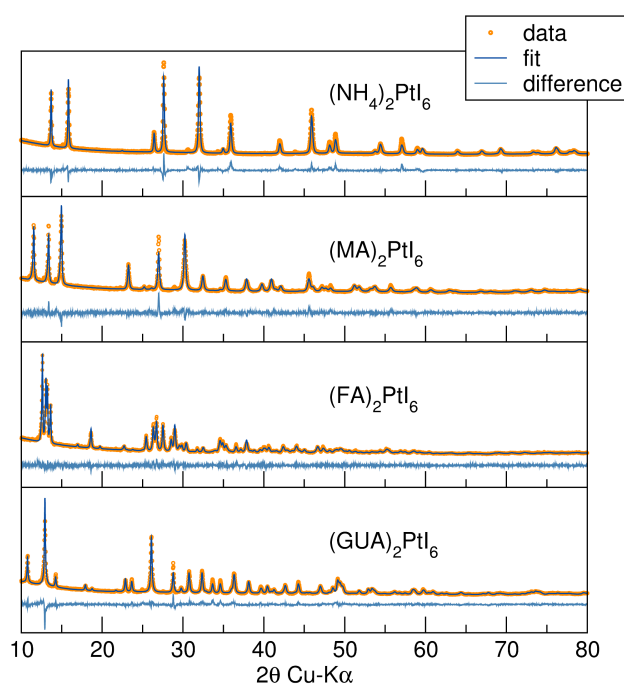

Figure S5: Rietveld refinements of the  $A_2PtI_6$  compounds.

Table S3: Refined lattice parameters of  $A_2PtI_6$  compounds.

| Formula      | $(NH_4)_2PtI_6$ | $(MA)_2PtI_6$ | $(FA)_2PtI_6$ | $(GUA)_2PtI_6$ |
|--------------|-----------------|---------------|---------------|----------------|
| $a$ (Å)      | 11.175          | 7.955         | 7.790         | 9.424          |
| $b$ (Å)      | 11.175          | 7.955         | 13.512        | 12.377         |
| $c$ (Å)      | 11.175          | 22.918        | 8.630         | 9.424          |
| $\alpha$ (°) | 90              | 90            | 90            | 90             |
| $\beta$ (°)  | 90              | 90            | 109.1         | 90             |
| $\gamma$ (°) | 90              | 120           | 90            | 120            |

## Nuclear Magnetic Resonance (NMR)

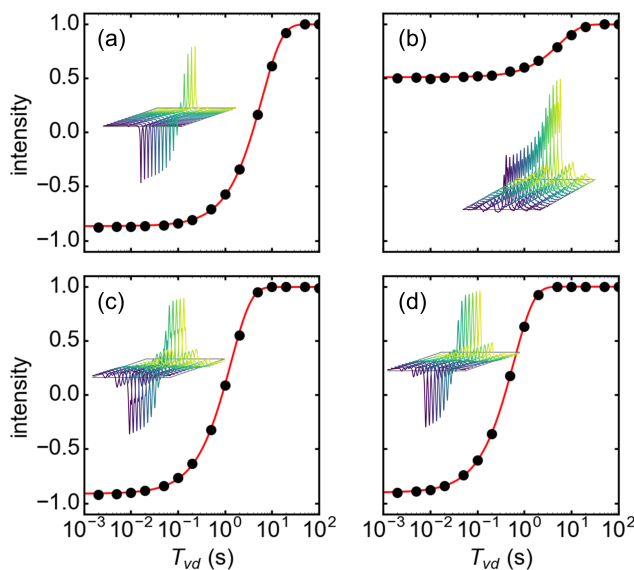

Figure S6:  $^1H$  inversion recovery experiments of the  $A_2PtI_6$  series. (a)  $(NH_4)_2PtI_6$ , (b)  $(MA)_2PtI_6$ , (c)  $(FA)_2PtI_6$ , (d)  $(GUA)_2PtI_6$ .

$^1H$  inversion recovery experiments (Figure S6) were conducted to assess the degree of molecular motion in the  $A_2PtI_6$  phases, and resulting longitudinal relaxation times,  $T_1$ , are given in Table 1 in the main text. We observe that  $T_1$  is substantially longer in the ammonium and methylammonium phases, and reduced in the formamidinium and guanidinium phases.

$^1H$  single-pulse NMR spectra under MAS for the  $A_2PtI_6$  phases are presented in Figure S7. At these modest MAS speeds,  $^1H$  dipolar interactions are only partially averaged out, and the three chemically distinct protons of the formamidinium ion cannot be re-

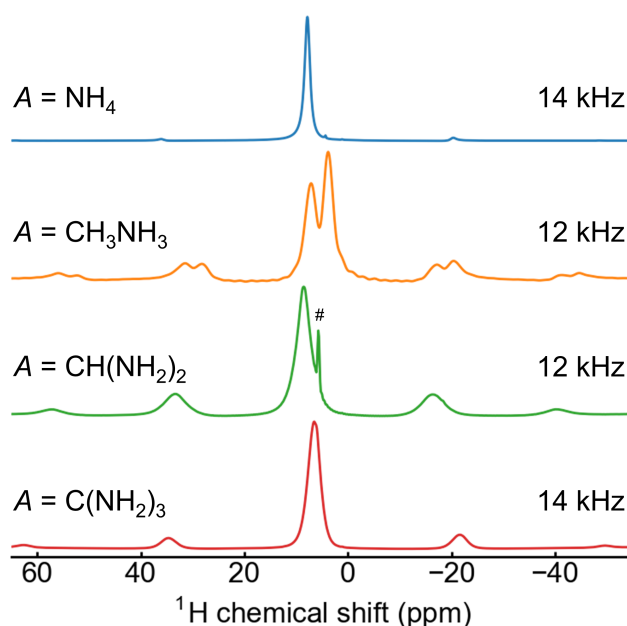

Figure S7: MAS  $^1\text{H}$  NMR spectra of  $\text{A}_2\text{PtI}_6$  phases, with spinning speed indicated. A small (3%), mobile impurity is evident in  $(\text{FA})_2\text{PtI}_6$  at 5.7 ppm, potentially from a  $\text{NH}_4$  impurity generated through degradation of the formamidine precursor. At this modest speed, strong  $^1\text{H}$  dipolar interactions prevent resolution of the three chemically distinct protons on the formamidine ion which are evident in solution. As  $[\text{NH}_4]^+$  and  $[\text{GUA}]^+$  each have one distinct proton, the broader signal for guanidine suggests a reduced state of molecular motion.

solved.

Table S4:  $^{195}\text{Pt}$  NMR lineshape parameters for  $\text{A}_2\text{PtI}_6$  phases, Pt site symmetry from X-ray diffraction, and experimental and *ab initio*  $[\text{PtI}_6]^{2-}$  octahedral volumes,  $V_{\text{oct}}$ .  $\Omega$  = Gaussian broadening.  $\Psi$  = Pt site symmetry

| A             | $\delta_{\text{iso}}$ (ppm) | $\delta_{\text{CSA}}$ (ppm) | $\eta$ | $\Omega$ (Hz) | $\Psi$      | Expt. $V_{\text{oct}}$ (Å) | Calc. $V_{\text{oct}}$ (Å) |
|---------------|-----------------------------|-----------------------------|--------|---------------|-------------|----------------------------|----------------------------|
| $\text{NH}_4$ | -5006                       | 59                          | 0.001  | 1963          | $m\bar{3}m$ | 25.32                      | 26.34                      |
| MA            | -5478                       | 166                         | 0.106  | 2377          | $\bar{3}m$  | 25.43                      | 26.49                      |
| FA            | -5518                       | 218                         | -0.009 | 1066          | $\bar{1}$   | 25.80                      | 26.60                      |
| GA            | -5926                       | 196                         | 0.224  | 1397          | $3m.$       | 25.42                      | 26.51                      |

$^{195}\text{Pt}$  lineshape and CSA parameters are given in Table S4, together with the Pt site symmetry from X-ray diffraction and the experimental and *ab initio* (vide infra)  $[\text{PtI}_6]^{2-}$  octahedral volumes. The CSA parameters correlate well with Pt site symmetry, with the smallest  $\delta_{\text{CSA}}$  for the highest site symmetry ( $m\bar{3}m$ ), and the largest  $\delta_{\text{CSA}}$  for the lowest Pt site symmetry ( $\bar{1}$ ). While no CSA would be expected for Pt in the ammonium phase, due to the octahedral site symmetry, very small sidebands are observed. These likely arise from residual heteronuclear dipolar coupling, spin-orbit coupling, or other sources of broadening. The Gaussian broadening parameters extracted in lineshape fitting indicate broader lines in the ammonium and methylammonium phase. The origin of this behavior is not immediately apparent, as subsequent analysis of motion (vide infra) suggests that if anything, molecular motion is faster in these phases. In sum, no features are seen in NMR which suggest that the local environments of Pt deviate significantly from those in the crystallographic models.

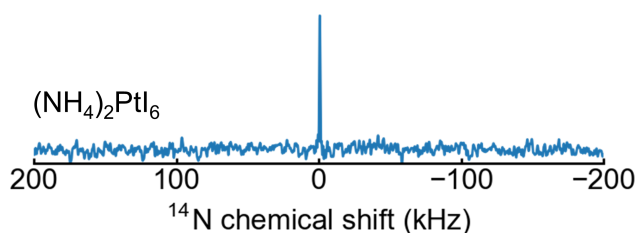

Figure S8: Spin-echo  $^{14}\text{N}$  ( $S = 1$ ) experiment for  $(\text{NH}_4)_2\text{PtI}_6$ , showing a narrow signal due to the tetrahedral molecular symmetry of the  $\text{NH}_4^+$  cation.

Spin-echo  $^{14}\text{N}$  ( $S = 1$ ) experiments were additionally carried out (Figure S8) on the



$A_2PtI_6$  phases, leveraging the quadrupole moment as a probe of motion. A narrow signal was easily observed for  $A = NH_4$  due to the tetrahedral molecular symmetry, while no signals were detected for the other three phases within one hour of acquisition. This result would be consistent with insufficiently rapid molecular motion to average out strong quadrupolar interactions, which are not already canceled due to the lower symmetry N environments in these molecules, though we cannot postulate more quantitative results without protracted experiments to acquire these (presumably) extremely broad signals.

## Electronic Structure

The electronic band structures of the  $A_2PtI_6$  phases, calculated within the framework of density functional theory (DFT), are presented in Figure 4 in the main text. Crystal structures were relaxed including semi-empirical van der Waals corrections, and the exchange-correlation energy was treated with the generalized gradient approximation (GGA; full computational details in the Methods section above).

The electronic bandgaps and line effective masses for electrons and holes (not the density of states effective masses) are given in Table S5, together with cell volumes from *ab initio* structure relaxation in Table S6. For the  $A_2PtI_6$  phases, bandgaps and effective masses increase monotonically with countercation size, consistent with our discussion of intermolecular I–I contact. Bandgaps are indirect in all cases, with the valence band maxima occurring at the zone centers. No pattern in the locations of the conduction band minima is readily apparent without detailed analysis of the spatial relationship between the Brillouin zones of the different lattice types. Despite the use of van der Waals corrections, the DFT relaxed structures overestimate unit cell volumes by 9% to 17% (corresponding to 3% to 5% linear), in line with the known underbinding of the GGA.

For  $(NH_4)_2PtI_6$ , the valence band is  $\sim 19$  meV higher at  $\Gamma$  than at X, while the conduction band minimum occurs at X. This phase then has an indirect bandgap, but the direct

Table S5: Calculated electronic bandgaps ( $E_g$ ) and line effective masses ( $m_e^*$ ,  $m_h^*$ ) for members of the  $A_2PtI_6$  series. For line effective masses, the first Brillouin zone special point labels the band extremum, and the second special point indicates the direction from the extremum along which the dispersion is fitted.

| Phase           | $E_g$ (eV) | VBM      | CBM | $m_e^* / m_0$                         | $m_h^* / m_0$                        |
|-----------------|------------|----------|-----|---------------------------------------|--------------------------------------|
| $(NH_4)_2PtI_6$ | 0.55       | $\Gamma$ | X   | X $\rightarrow\Gamma$ : 0.43          | $\Gamma\rightarrow$ X (light): 0.64  |
|                 |            |          |     | X $\rightarrow$ W: 0.39               | $\Gamma\rightarrow$ X (heavy): 25.3  |
|                 |            |          |     | X $\rightarrow$ U: 0.38               | $\Gamma\rightarrow$ K (light): 0.64  |
|                 |            |          |     |                                       | $\Gamma\rightarrow$ K (medium): 0.92 |
|                 |            |          |     |                                       | $\Gamma\rightarrow$ K (heavy): 1.90  |
|                 |            |          |     |                                       | $\Gamma\rightarrow$ L (light): 0.79  |
|                 |            |          |     |                                       | $\Gamma\rightarrow$ K (heavy): 1.47  |
| $(MA)_2PtI_6$   | 0.94       | $\Gamma$ | F   | F $\rightarrow$ Q: 0.61               | $\Gamma\rightarrow$ L: 1.29          |
|                 |            |          |     | F $\rightarrow$ P <sub>1</sub> : 0.74 | $\Gamma\rightarrow$ Z: 1.29          |
|                 |            |          |     |                                       | $\Gamma\rightarrow$ X: 2.30          |
| $(FA)_2PtI_6$   | 1.00       | $\Gamma$ | D   | D $\rightarrow$ Z: 0.78               | $\Gamma\rightarrow$ Y: 1.75          |
|                 |            |          |     | D $\rightarrow$ M: 0.87               | $\Gamma\rightarrow$ X: 3.98          |
|                 |            |          |     | D $\rightarrow$ Y: 0.61               | $\Gamma\rightarrow$ Z: 1.74          |
| $(GUA)_2PtI_6$  | 1.41       | $\Gamma$ | M   | M $\rightarrow\Gamma$ : 3.46          | $\Gamma\rightarrow$ M (light): 3.18  |
|                 |            |          |     | M $\rightarrow$ K: 11.6               | $\Gamma\rightarrow$ M (heavy): 6.08  |
|                 |            |          |     | M $\rightarrow$ L: 32.2               | $\Gamma\rightarrow$ K (light): 3.26  |
|                 |            |          |     | K $\rightarrow$ M: 8.72               | $\Gamma\rightarrow$ K (heavy): 5.97  |
|                 |            |          |     | K $\rightarrow\Gamma$ : 3.41          | $\Gamma\rightarrow$ A: 4.24          |
|                 |            |          |     | K $\rightarrow$ H: 2.86               |                                      |
|                 |            |          |     | L $\rightarrow$ A: 2.05               |                                      |
|                 |            |          |     | L $\rightarrow$ H: 2.62               |                                      |

Table S6: Calculated and experimental volume per formula unit (V / F.U.) for members of the  $A_2PtI_6$  series.

| Phase           | V / F.U. ( $\text{\AA}^3$ ), calc. | V / F.U. ( $\text{\AA}^3$ ), expt. |
|-----------------|------------------------------------|------------------------------------|
| $(NH_4)_2PtI_6$ | 382.2                              | 350.25                             |
| $(MA)_2PtI_6$   | 475.1                              | 416.83                             |
| $(FA)_2PtI_6$   | 501.4                              | 427.50                             |
| $(GUA)_2PtI_6$  | 531.3                              | 462.39                             |

transition at X is only slightly higher in energy. The valence band is quite flat along the  $\Gamma-X$  line, much like the isotypic  $\text{Cs}_2\text{SnI}_6$ .<sup>12-14</sup>

For  $(\text{MA})_2\text{PtI}_6$ , the valence band is  $\sim 70$  meV higher at  $\Gamma$  than at F, while the conduction band minimum occurs at F. This phase then has an indirect bandgap, but the direct transition at F is only slightly higher in energy.

For  $(\text{FA})_2\text{PtI}_6$ , the conduction band is  $\sim 30$  meV lower at D than at  $\Gamma$ . The valence band is  $\sim 25$  meV higher at  $\Gamma$  than at X, and  $\sim 25$  meV higher at  $\Gamma$  than at X. Accordingly, the band gap is indirect, but direct transitions at both  $\Gamma$  and D are only slightly higher in energy.

For  $(\text{GUA})_2\text{PtI}_6$ , the conduction band is nearly degenerate in energy ( $< 10$  meV difference) at the M, K, and L points, with the energy at M being the lowest by a slight margin. In contrast, all other local maxima of the valence band are 10s of meV lower in energy than the valence band maximum at  $\Gamma$ . Once again, the bandgap is indirect, but direct transitions at K and L are only somewhat higher in energy.

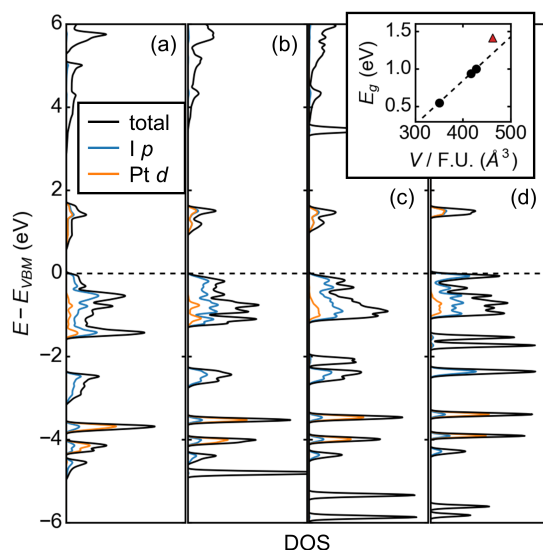

Figure S9: Electronic densities of states (GGA-PBE) for  $\text{A}_2\text{PtI}_6$  phases, including orbital projections of the  $\text{I } p$  and  $\text{Pt } d$  states. Energies are referenced to the valence band maximum for each phase. Inset: The calculated bandgap is correlated with cell volume for the  $\text{A} = (\text{NH}_4)$ , MA, and FA phases ( $\bullet$ ), which are increasingly distorted versions of the same anti-fluorite structure type. The transition to a different  $[\text{PtI}_6]^{2-}$  packing arrangement for  $\text{A} = \text{GA}$  ( $\triangle$ ) widens the bandgap relative to this trend.

The electronic densities of states calculated for the  $A_2PtI_6$  phases, as well as the correlation between bandgap and unit cell volume, are presented in Figure S9. Tracking the position of the localized I  $s$  states (not shown,  $\sim 12$  eV below the VBM) relative to the VBM suggests the VBM drops relative to the vacuum with increasing counteranion size (and increasing bandgap). In essence, the band widths are reduced while the band centers remain nearly constant, as expected for phases with somewhat ionic Pt–I bonding and varying degrees of intermolecular I–I contact. For the distorted VHDP ammonium, methylammonium, and formamidinium phases, there is a very strong correlation between bandgap and cell volume (Figure S9 inset), while the different anion packing of the guanidinium phase results in a larger bandgap than expected from this trend.

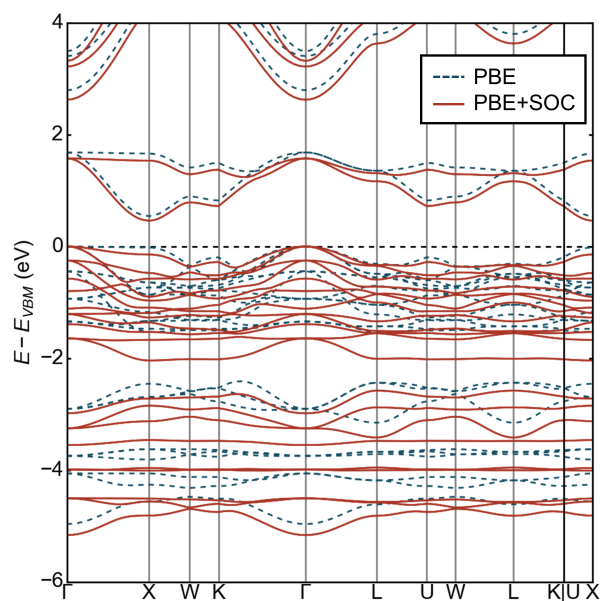

Figure S10: Comparison of PBE to PBE+SOC calculations for  $(NH_4)_2PtI_6$ .

A calculation was performed on  $(NH_4)_2PtI_6$  with both PBE and PBE+SOC, which indicated that the effect of spin-orbit coupling is modest (Figure S10).

## Thermogravimetric Analysis (TGA)

Thermogravimetric analysis, presented in Figures S11 - S14, show similar degradation temperatures for each member of the  $A_2PtI_6$  series.

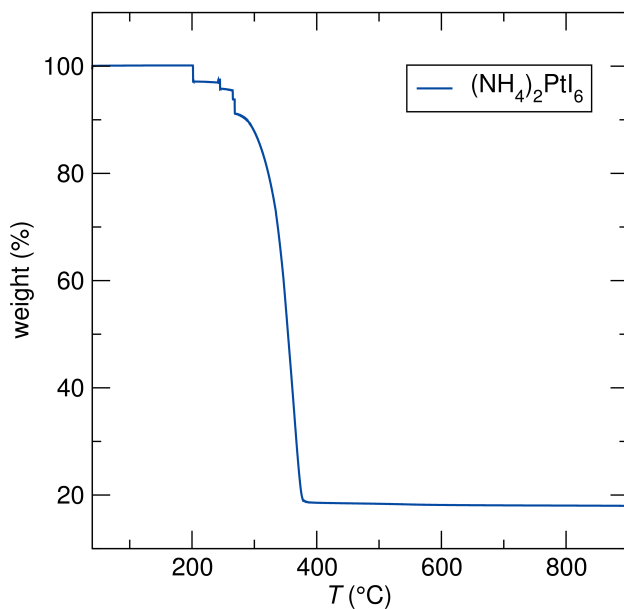

Figure S11: TGA data for  $(NH_4)_2PtI_6$  from room temperature to 900°C.

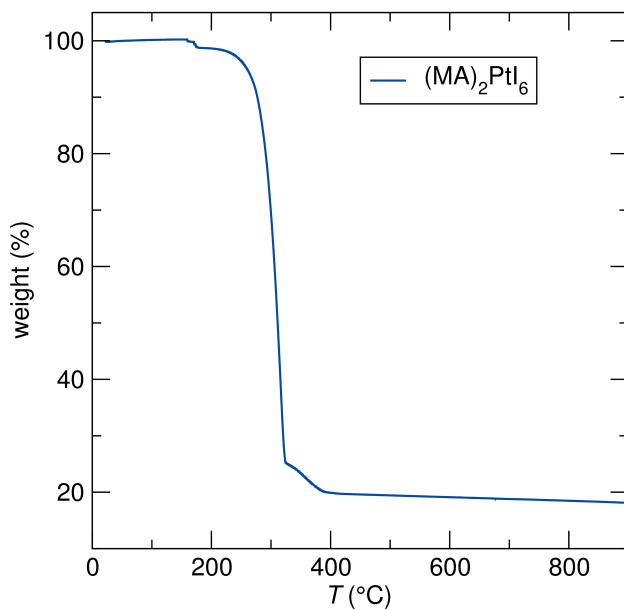

Figure S12: TGA data for  $(MA)_2PtI_6$  from room temperature to 900°C.

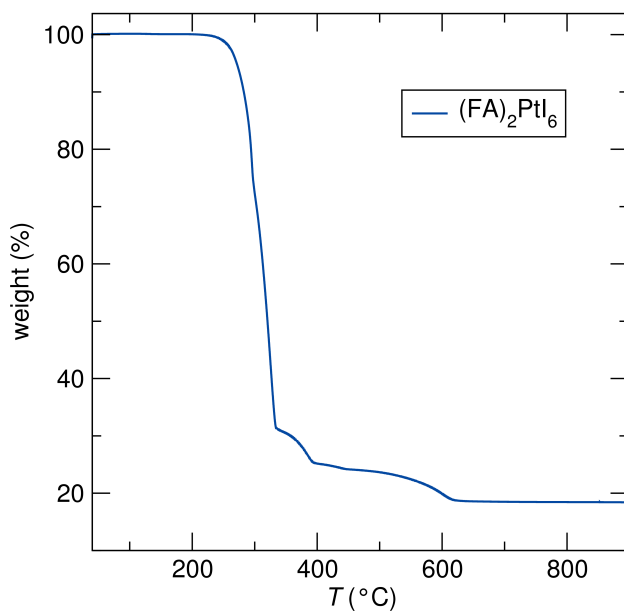

Figure S13: TGA data for  $(\text{FA})_2\text{PtI}_6$  from room temperature to  $900^{\circ}\text{C}$ .

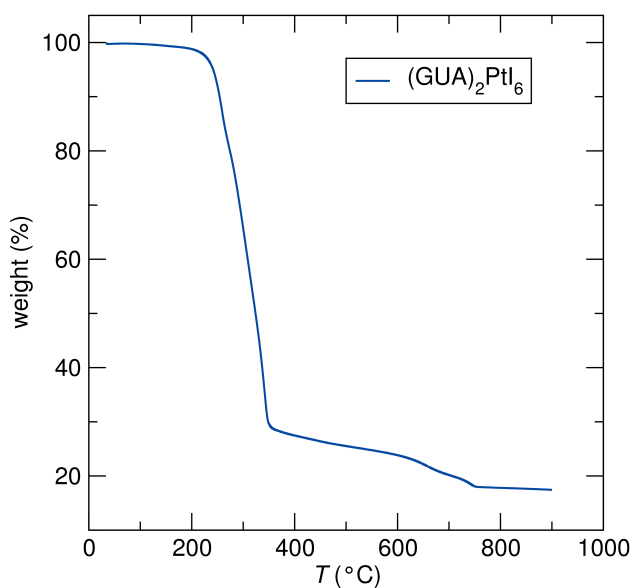

Figure S14: TGA data for  $(\text{GUA})_2\text{PtI}_6$  from room temperature to  $900^{\circ}\text{C}$ .

## Differential Scanning Calorimetry (DSC)

Differential scanning calorimetry of the  $\text{A}_2\text{PtI}_6$  is presented in Figures S15 - S18.

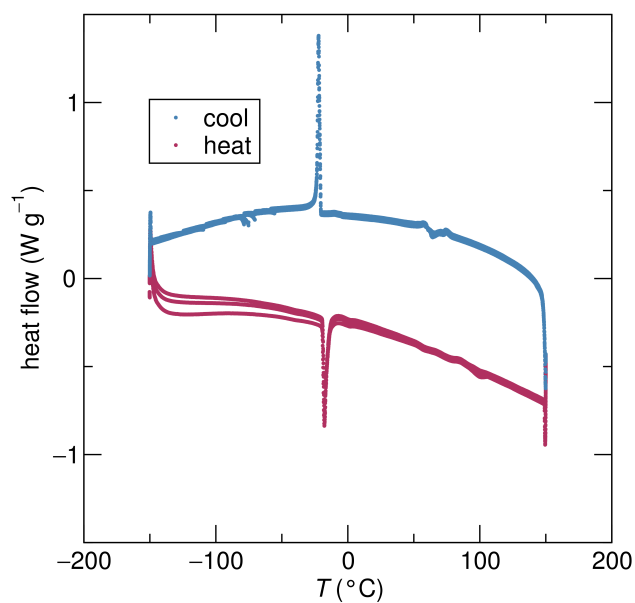

Figure S15: DSC data for  $(\text{NH}_4)_2\text{PtI}_6$  between  $-150^{\circ}\text{C}$  and  $150^{\circ}\text{C}$ . A first order phase transition can be seen at  $-20^{\circ}\text{C}$ .

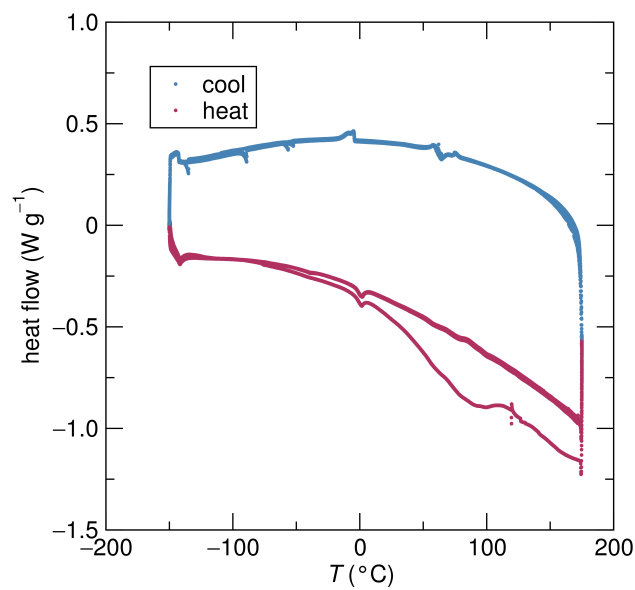

Figure S16: DSC data for  $(\text{MA})_2\text{PtI}_6$  between  $-150^{\circ}\text{C}$  and  $175^{\circ}\text{C}$ . No first order phase transition is observed.

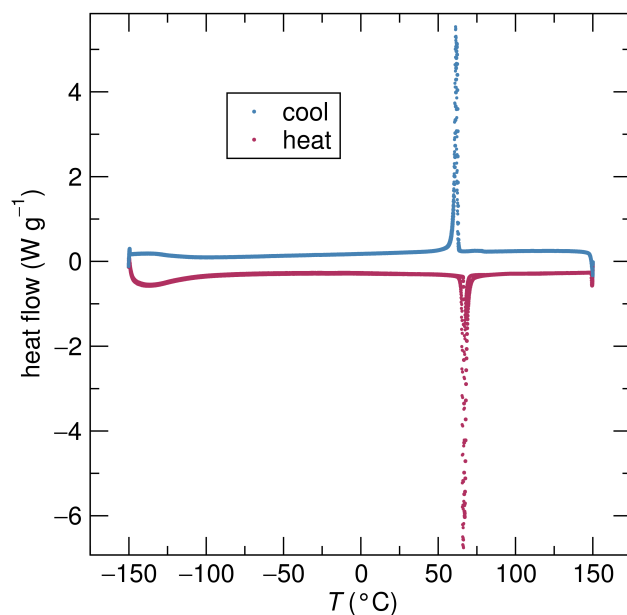

Figure S17: TGA data for (FA)<sub>2</sub>PtI<sub>6</sub> between  $-150^{\circ}\text{C}$  and  $150^{\circ}\text{C}$ . A first order phase transition is observed near  $63^{\circ}\text{C}$ .

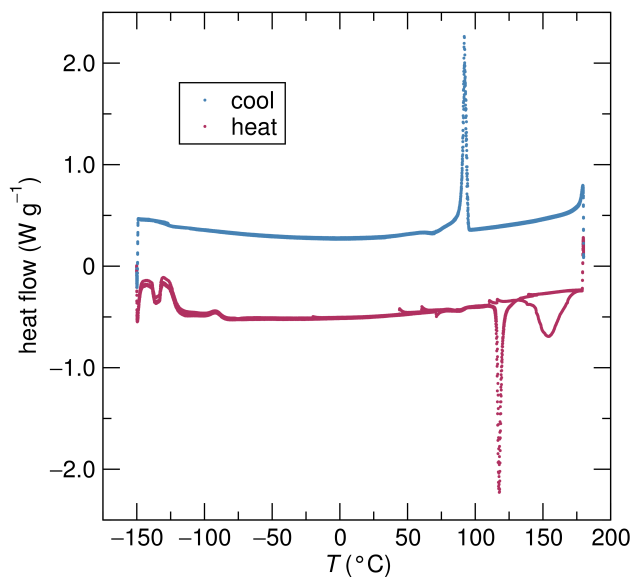

Figure S18: TGA data for (GUA)<sub>2</sub>PtI<sub>6</sub> between  $-150^{\circ}\text{C}$  and  $175^{\circ}\text{C}$ . There is a second order phase transition near  $100^{\circ}\text{C}$  associated with increased molecular motion of the guanidinium cation.



## References

- (1) Ewing, P. J.; Pauling, L. XIII. The Crystal Structure of Potassium Chloroplatinate. *Z. Kristallogr.* **1928**, 68, 223–230.
- (2) Williams, R. J.; Dillin, D. R.; Milligan, W. O. Structure refinement of potassium chloroplatinate by powder and single-crystal methods. *Acta Crystallogr. Sect. B-Struct. Sci.* **1973**, 29, 1369–1372.
- (3) A. Glazer. The classification of tilted octahedra in perovskites. *Acta Crystallogr. Sect. B-Struct. Sci.* **1972**, 28, 3384–3392.
- (4) Kume, Y.; Ikeda, R.; Nakamura, D. Structural Phase Transition in Various Methylammonium Hexahalometallates(IV) as Studied by the NQR of Halogens. *J. Magn. Reson.* **1979**, 33, 331–344.
- (5) Nakamura, D. Nuclear Quadrupole Resonance Studies of Structural and Magnetic Phase Transitions. *J. Mol. Struct.* **1983**, 111, 341–356.
- (6) Larson, A. C.; Von Dreele, R. B. "General Structure Analysis System (GSAS)", Los Alamos National Laboratory Report LAUR, **2000**, 86–748
- (7) Toby, B. H. *EXPGUI*, a Graphical User Interface for GSAS. *Appl. Cryst.* **2001**, 34, 210–213.
- (8) Evans, H.A.; Schueller, E.C.; Smock, S.R.; Wu, G.; Seshadri, R.; Wudl, F. Perovskite-Related Hybrid Noble Metal Iodides: Formamidinium Platinum Iodide [(FA)<sub>2</sub>Pt<sup>IV</sup>I<sub>6</sub>] and Mixed-Valence Methylammonium Gold Iodide [(MA)<sub>2</sub>Au<sup>I</sup>Au<sup>III</sup>I<sub>6</sub>]. *Inorg. Chim. Acta* **2017**, 468, 280–284.
- (9) Ishida, H.; Kashino, S. Bis(dimethylammonium) Hexachlorotellurate(IV). *Acta Cryst.* **1998**, C54, 1811–1813.

- (10) Ghozlen, M. H. B.; Daoud, A. Dimethylammonium Hexachlorostannate(IV). *Acta Cryst.* **1981**, *B37*, 1415–1416.
- (11) Ishida, H.; Furukawa, Y.; Kashino, S. Bis(guanidinium) hexachlorostannate(IV). *Acta Cryst.* **1999**, *55*, 1995–1997.
- (12) Lee, B.; Stoumpos, C. C.; Zhou, N.; Hao, F.; Malliakas, C.; Yeh, C.-Y.; Marks, T. J.; Kanatzidis, M. G.; Chang, R. P. H. Air-Stable Molecular Semiconducting Iodosalts for Solar Cell Applications:  $\text{Cs}_2\text{SnI}_6$  as a Hole Conductor. *J. Am. Chem. Soc.* **2014**, *136*, 15379–15385.
- (13) Maughan, A. E.; Ganose, A. M.; Bordelon, M. M.; Miller, E. M.; Scanlon, D. O.; Neilson, J. R. Defect Tolerance to Intolerance in the Vacancy-Ordered Double Perovskite Semiconductors  $\text{Cs}_2\text{SnI}_6$  and  $\text{Cs}_2\text{TeI}_6$ . *J. Am. Chem. Soc.* **2017**, *138*, 8453–8464.
- (14) Saparov, B.; Sun, J-P.; Meng, W.; Xiao, Z.; Duan, H-S.; Gunawan, O.; Shin, D.; Hill, I. G.; Yan, Y.; Mitzi, D. B. Thin-Film Deposition and Characterization of a Sn-Deficient Perovskite Derivative  $\text{Cs}_2\text{SnI}_6$ . *Chem. Mater.* **2016**, *28*, 2315–2322.
